# Supplementary material
Source: PubMed Central journal article supplement (PMC6679722)
Supplement: NIHMS1034736-supplement-Supp_TableS1-2.pdf [file NIHMS1034736-supplement-Supp_TableS1-2.pdf]

# Supplementary Material

## Energy Metabolism and Drug Response in Myeloid Leukaemic Stem Cells

Alfonso E. Bencomo-Álvarez<sup>1</sup>, Andres J. Rubio<sup>1</sup>, Mayra A. Gonzalez<sup>1</sup>, and Anna M. Eiring<sup>1\*</sup>

<sup>1</sup>Texas Tech University Health Sciences Center El Paso, Department of Molecular and Translational  
Medicine, Paul L. Foster School of Medicine, El Paso, TX, USA

\*Corresponding Author: Anna M. Eiring, PhD; 5001 El Paso Drive, Room 2112, El Paso, TX 79905; Ph:  
(915) 215-4812; E-Mail: [anna.eiring@ttuhsc.edu](mailto:anna.eiring@ttuhsc.edu)

Running Title: Energy Metabolism and Drug Response in Myeloid LSCs

**Keywords:** Cancer stem cell (CSC), Leukaemic stem cell (LSC), Chronic myeloid leukaemia (CML),  
Acute myeloid leukaemia (AML), Myelodysplastic syndrome (MDS)

**Table SI.** Published anti-LSC clinical trials targeting cell surface molecules

| LSC Targets                   | Agent(s)              | Disease(s) | Trial Identifier      | References                                                           |
|-------------------------------|-----------------------|------------|-----------------------|----------------------------------------------------------------------|
| <i>Cell Surface Molecules</i> |                       |            |                       |                                                                      |
| CD123                         | CSL360                | AML        | NCT00401739           | He et al. 2015                                                       |
|                               | SGN-CD123A            | AML        | NCT02848248           | Li et al. 2018                                                       |
| CD33                          | Vadastuximab          | AML        | NCT01902329           | Stein et al. 2018                                                    |
|                               |                       |            | NCT02326584           | Fathi et al. 2018<br>Erba et al. 2016                                |
|                               | CAR-T cells           | AML        | NCT01864902           | Wang et al. 2015                                                     |
|                               | Gemtuzumab ozogamicin | AML        | NCT01407757           | Vujkovic et al. 2017                                                 |
|                               |                       |            | NCT00909168           | Candoni et al. 2018<br>Gottardi et al. 2017<br>Iacobucci et al. 2013 |
|                               | Lintuzumab (HuM195)   | AML, MDS   | NCT00672165           | Jurcic et al. 2013                                                   |
| NCT00038051                   |                       |            | Borthakur et al. 2013 |                                                                      |
| NCT00014495                   |                       |            | Rosenblat et al. 2010 |                                                                      |
| NCT00283114                   |                       |            | Raza et al. 2009      |                                                                      |
| CD44                          | RG7356                | AML        | NCT00528333           | Sekeres et al. 2013                                                  |
|                               |                       |            | NCT01641250           | Vey et al. 2016                                                      |
| CXCR4/CXCL12                  | Plerixafor (AMD3100)  | AML        | NCT00512252           | Uy et al. 2012                                                       |
|                               |                       | AML        | NCT00906945           | Uy et al. 2017                                                       |
|                               |                       | AML, MDS   | NCT01319864           | Cooper et al. 2017                                                   |
|                               |                       | AML        | NCT01435343           | Martinez-Cuadron et al. 2018                                         |
|                               |                       | AML        | NCT01352650           | Allan et al. 2018                                                    |

AML, acute myeloid leukaemia; CAR-T cells, chimeric antigen receptor-T cells; CD, cluster of differentiation; CML, chronic myeloid leukaemia; CMML, chronic myelomonocytic leukaemia; CXCR4/CXCL12, chemokine receptor type 4 / chemokine ligand 12; LSC, leukaemic stem cell; MDS, myelodysplastic syndrome.

**Table SII.** Published anti-LSC clinical trials targeting cell signaling and metabolism

| LSC Targets                     | Agent(s)                | Disease(s)    | Trial Identifier | References                                                                         |
|---------------------------------|-------------------------|---------------|------------------|------------------------------------------------------------------------------------|
| <i>Cell Signaling Molecules</i> |                         |               |                  |                                                                                    |
| PI3K/AKT                        | Perifosine, UCN-01      | CML, AML, MDS | NCT00301938      | Gojo et al. 2013                                                                   |
|                                 | MK-2206                 | AML           | NCT01253447      | Konopleva et al. 2014                                                              |
|                                 | Buparlisib (BKM120)     | AML           | NCT01396499      | Ragon et al. 2017                                                                  |
| NF- $\kappa$ B                  | Bortezomib              | AML, MDS      | NCT00580242      | Attar et al. 2013                                                                  |
|                                 |                         |               | NCT00666588      | Horton et al. 2014                                                                 |
|                                 |                         |               | NCT01174888      | Walker et al. 2016                                                                 |
|                                 |                         |               | NCT01371981      | Hanley et al. 2017                                                                 |
| Sonic Hedgehog                  | Glasdegib (PF-04449913) | AML, MDS      | NCT01546038      | Savona et al. 2018<br>Cortes et al. 2018 (1)<br>Cortes et al. 2018 (2)             |
| <i>Cellular Metabolism</i>      |                         |               |                  |                                                                                    |
| BCL-2                           | Venetoclax              | AML, MDS      | NCT02287233      | DiNardo et al. 2017                                                                |
|                                 |                         | AML           | NCT02203773      | DiNardo et al. 2018                                                                |
| IDH1                            | AG120                   | AML           | NCT02074839      | Birendra et al. 2016<br>DiNardo et al. 2018                                        |
| IDH2                            | Enasidenib (AG221)      | AML, MDS      | NCT01915498      | Stein et al. 2017<br>Fathi et al. 2018<br>Stein et al. 2019<br>Pollyea et al. 2019 |
| <i>Histone Modifiers</i>        |                         |               |                  |                                                                                    |
| DOT1-L                          | Pinometostat (EPZ-5676) | AML, MDS      | NCT01684150      | Stein et al. 2018                                                                  |

AML, acute myeloid leukaemia; BCL-2, B-cell lymphoma 2; CML, chronic myeloid leukaemia; IDH, isocitrate dehydrogenase; DOT1-L, disruptor of telomeric silencing 1-like; LSC, leukaemic stem cell; MDS, myelodysplastic syndrome; NF $\kappa$ B, nuclear factor kappa B; PI3K/AKT, phosphoinositide 3-kinase/alpha threonine-protein kinase.
